# Supplementary material
Source: PubMed Central journal article supplement (PMC7855407)

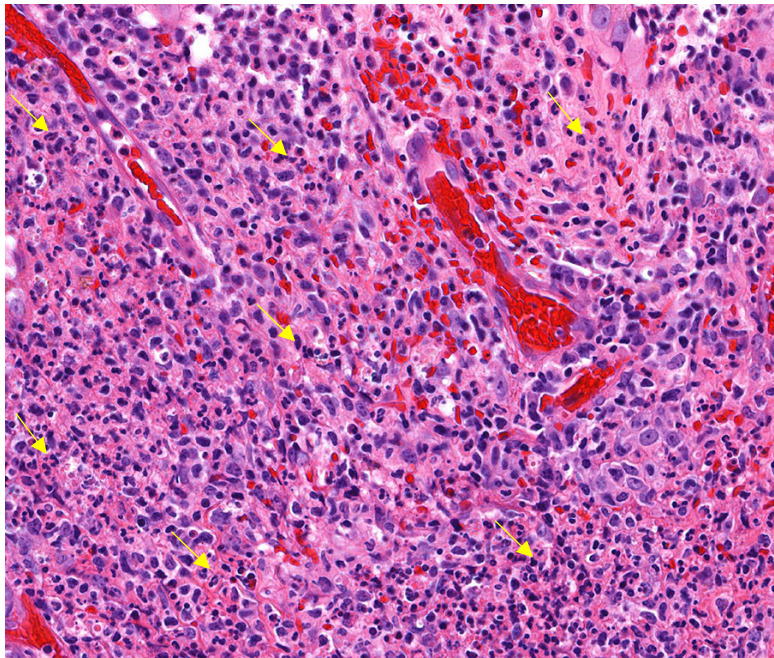

Supplement: NIHMS1634427-supplement-10875_2020_877_MOESM1_ESM.pdf [file NIHMS1634427-supplement-10875_2020_877_MOESM1_ESM.pdf]
